# Supplementary material for: Lipid saturation controls nuclear envelope function
Source: PubMed Central journal article supplement (PMC10495262; doi:10.1038/s41556-023-01207-8), 2023-08-17

Extended Data Fig. 1f

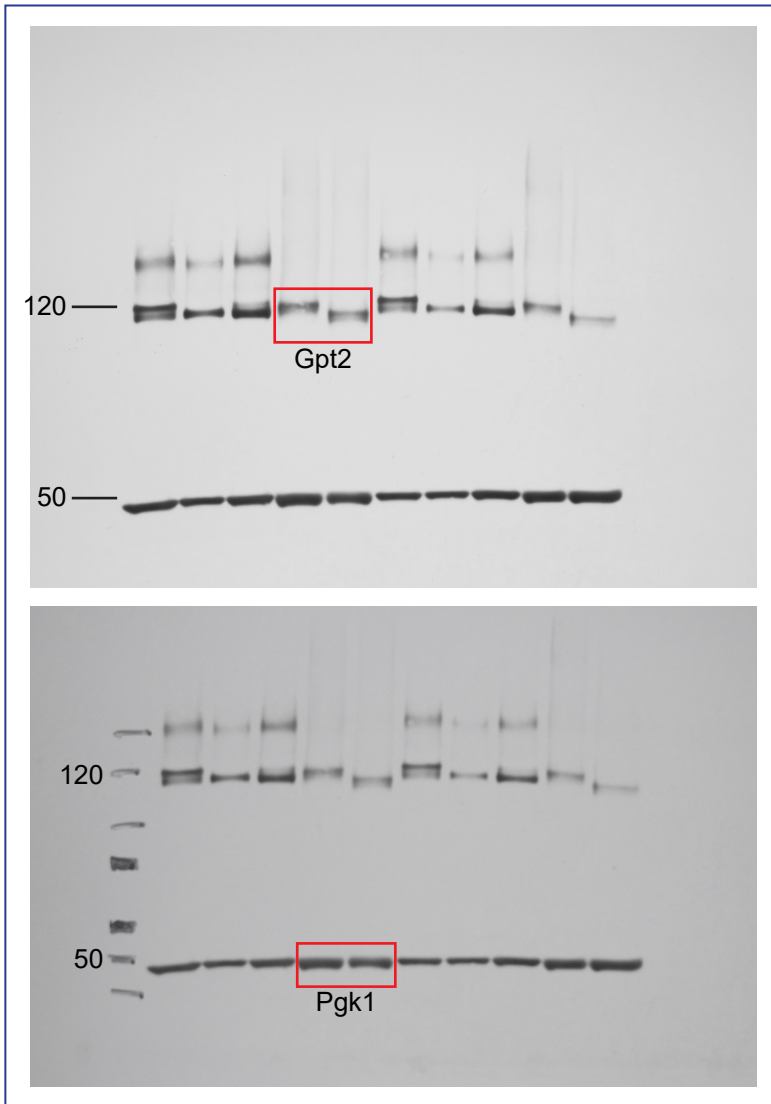

Supplement: 41556_2023_1207_MOESM14_ESM.pdf [file 41556_2023_1207_MOESM14_ESM.pdf]
